# Supplementary material
Source: publisher figshare collection journal article supplement (https://asha.figshare.com/articles/dataset/_/14963805)
Supplement: Supplementary file 1 [file 1]

## Supplemental Appendix A. Examples of code-mixing.

### Example 1

4 years; 10 months; SK; Cantonese story generation

|          |       |         |        |      |
|----------|-------|---------|--------|------|
| 跟住       | 佢     | 好似      | pirate | 咁\   |
| gan1zyu6 | keoi5 | hou2ci5 | pirate | gam3 |
| then     | he    | as if   | pirate | this |

[And then he was like a pirate]

In (1) the child borrowed an English noun, *pirate*, into his Cantonese story generation, assuming his expected position in Cantonese. In this example, *pirate* substitutes *hoi2dou6* and is used as bare-noun without any English determiner or Cantonese classifier.

### Example 2

4 years; 5 months; JK; Cantonese story generation

|          |       |        |            |            |
|----------|-------|--------|------------|------------|
| 跟住       | 佢     | 搵      | 咗          | everywhere |
| gan1zyu6 | keoi5 | wan2   | zo2        | everywhere |
| then     | he    | search | PERFECTIVE | everywhere |

[And then he looked everywhere]

In (2) the child used the English adverb in his expected syntactic position in English, that is, after the verbal phrase search (*wan2zo2*). However, in Cantonese, an adverb is expected to precede the verbal phrase (in this particular case, a more complex structure with fronting of the phrase with universal quantification *dou6dou6* “everywhere” and an obligatory *dou1* “also” before the verb would be expected (cf. Matthews & Yip, 2011, p. 301).

## Reference

Matthews, S., & Yip, V. (2011). *Cantonese: A comprehensive grammar*. London, United Kingdom: Routledge.
