# Supplementary material
Source: publisher figshare collection journal article supplement (https://asha.figshare.com/articles/dataset/_/14963805)
Supplement: Supplementary file 2 [file 1]

**Supplemental Table 4.** Pearson correlations between potential predictors and outcome variables.

|   |                                     | 1       | 2     | 3       | 4      | 5       | 6       | 7       | 8 |
|---|-------------------------------------|---------|-------|---------|--------|---------|---------|---------|---|
| 1 | Age (months)                        | —       |       |         |        |         |         |         |   |
| 2 | Lang. use in the home <sup>a</sup>  | −.056   | —     |         |        |         |         |         |   |
| 3 | Vocabulary (English) <sup>b</sup>   | .415**  | .084  | —       |        |         |         |         |   |
| 4 | Vocabulary (Cantonese) <sup>c</sup> | .427**  | −.152 | .271    | —      |         |         |         |   |
| 5 | English microstructure              | .400**  | −.072 | .645*** | .173   | —       |         |         |   |
| 6 | Cantonese microstructure            | .251    | −.287 | .278    | .271   | .507*** | —       |         |   |
| 7 | Story Grammar (Cantonese)           | .462**  | −.19  | .318*   | .458** | .391**  | .578*** | —       |   |
| 8 | Story Grammar (English)             | .594*** | −.055 | .479**  | .436** | .595*** | .323*   | .669*** | — |

<sup>a</sup>Language use in the Home Score (Paradis, 2011). <sup>b</sup>Expressive One Word Picture Vocabulary Test– III (EOWPVT-III; Brownell, 2000). <sup>c</sup>Peabody Picture Vocabulary Test–III (Dunn & Dunn, 1997) adopted from Chow and McBride-Chang (2003).

\* $p < .05$ ; \*\* $p < .01$ ; \*\*\* $p < .001$ .

## References

- Brownell, R. (Ed.). (2000). *Expressive One-Word Picture Vocabulary Test*. Novato, CA: Academic Therapy.
- Chow, B. W., & McBride-Chang, C. (2003). Promoting language and literacy development through parent–child reading in Hong Kong preschoolers. *Early Education and Development, 14*, 233–248.
- Dunn, L. M., & Dunn, L. M. (1997). *Peabody Picture Vocabulary Test–III*. Circle Pines, MN: AGS.
- Paradis, J. (2011). Individual differences in child English second language acquisition: Comparing child-internal and child-external factors. *Linguistic Approaches to Bilingualism, 1*, 213–237.

## Supplemental Appendix A. Examples of code-mixing.

### Example 1

4 years; 10 months; SK; Cantonese story generation

|          |       |         |        |      |
|----------|-------|---------|--------|------|
| 跟住       | 佢     | 好似      | pirate | 咁\   |
| gan1zyu6 | keoi5 | hou2ci5 | pirate | gam3 |
| then     | he    | as if   | pirate | this |

[And then he was like a pirate]

In (1) the child borrowed an English noun, *pirate*, into his Cantonese story generation, assuming his expected position in Cantonese. In this example, *pirate* substitutes *hoi2dou6* and is used as bare-noun without any English determiner or Cantonese classifier.

### Example 2

4 years; 5 months; JK; Cantonese story generation

|          |       |        |            |            |
|----------|-------|--------|------------|------------|
| 跟住       | 佢     | 搵      | 咗          | everywhere |
| gan1zyu6 | keoi5 | wan2   | zo2        | everywhere |
| then     | he    | search | PERFECTIVE | everywhere |

[And then he looked everywhere]

In (2) the child used the English adverb in his expected syntactic position in English, that is, after the verbal phrase search (*wan2zo2*). However, in Cantonese, an adverb is expected to precede the verbal phrase (in this particular case, a more complex structure with fronting of the phrase with universal quantification *dou6dou6* “everywhere” and an obligatory *dou1* “also” before the verb would be expected (cf. Matthews & Yip, 2011, p. 301).

## Reference

Matthews, S., & Yip, V. (2011). *Cantonese: A comprehensive grammar*. London, United Kingdom: Routledge.
